# Supplementary material
Source: Springer Nature journal article supplement (https://www.springermedizin.de/resource/supplementary/12885_2012_3887_MOESM4_ESM.pdf/9464700)

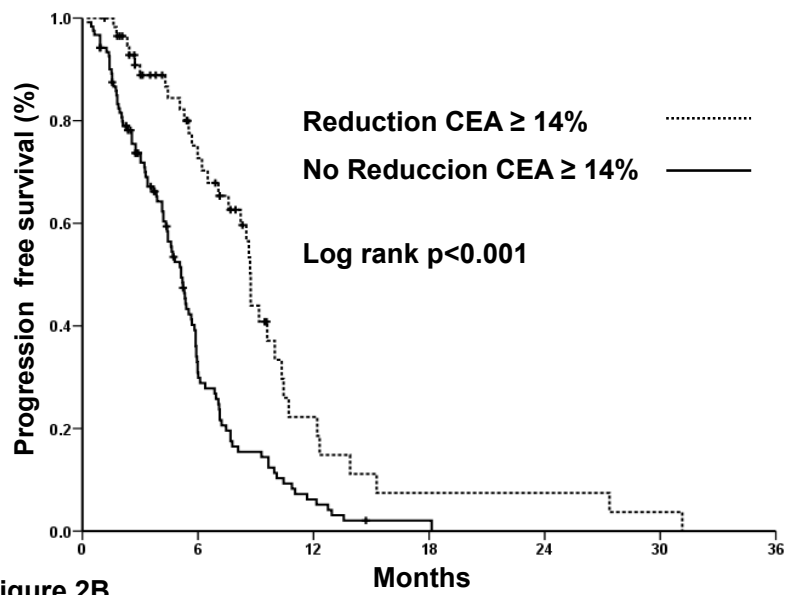

Figure 2B

Supplement: MOESM4 [file 9464700]
